# Supplementary material for: Validation of Health Education Material for Youth: A Step to Ensure Implementation Fidelity in Community-Based Interventions
Source: MDPI journal article supplement (doi:10.3390/healthcare8010008), 2019-12-27
Supplement: s1 [file s1]

**Supplementary Table S1.** Questions for pre- and post-test knowledge assessment (construct validity) in the questionnaires for adolescent boys and girls (n = 25).

| Four sections         | Questions in each section for adolescent boys and girls                          |
|-----------------------|----------------------------------------------------------------------------------|
| Reproductive section  | Q1. Pubertal changes in girls or boys                                            |
|                       | Q2. Truth about menstruation (girls) or nightfall (boys)                         |
|                       | Q3. What do irregular periods (girls) or masturbation in boys indicate?          |
|                       | Q4. Physiology of menstruation (girls) or how important is size of penis (boys)? |
|                       | Q5. Age at menarche (girls) or age at puberty in boys                            |
|                       | Q6. Duration of a menstrual cycle or what is semen (boys)?                       |
|                       | Q7. Importance of genital hygiene                                                |
|                       | Q8. Truth about emergency contraceptives                                         |
|                       | Q9. Routes of transmission of HIV infection between male and female              |
|                       | Q10. Is AIDS curable?                                                            |
|                       | Q11. Truth about AIDS                                                            |
|                       | Q12. Contraceptives that are protective against HIV/AIDS                         |
| Mental health section | Q13. Symptoms of mental problems during adolescence                              |
|                       | Q14. Life skills required for prevention of drug addiction                       |
|                       | Q15. Psychological changes during puberty                                        |
| Nutrition section     | Q16. What does deficiency of iron leads to?                                      |
|                       | Q17. Fruits are rich in which micronutrients?                                    |
|                       | Q18. Lifestyle risk factors for non-communicable diseases                        |
|                       | Q19. Side effects of drinking and smoking                                        |
| Miscellaneous section | Q20. Hand hygiene                                                                |
|                       | Q21. Side effects of early marriage                                              |
|                       | Q22. First aid steps                                                             |
|                       | Q23. Action after dog bite                                                       |
|                       | Q24. Truth about intimate partner violence                                       |
|                       | Q25. Legal age of marriage                                                       |

**Supplementary Table S2.** Questions for pre- and post-test knowledge assessment (construct validity) in the questionnaire for young married women (n = 19).

| Three sections             | Questions in each section for young married women                                                                                      |
|----------------------------|----------------------------------------------------------------------------------------------------------------------------------------|
| Reproductive section       | Q1. Exclusive breastfeeding                                                                                                            |
|                            | Q2. Maternal nutrition during pregnancy                                                                                                |
|                            | Q3. HIV tests of women during pregnancy                                                                                                |
|                            | Q4. When should a woman go for antenatal check-ups first time?                                                                         |
|                            | Q5. Minimum number of antenatal check-ups needed                                                                                       |
|                            | Q6. Responsibility of family planning                                                                                                  |
|                            | Q7. Types of contraceptives                                                                                                            |
|                            | Q8. Abortion care                                                                                                                      |
|                            | Q9. Routes of HIV transmission                                                                                                         |
|                            | Q10. Do mosquitoes spread HIV?                                                                                                         |
|                            | Q11. Contraceptives protective of HIV                                                                                                  |
| Preconception care section | Q12. Should a woman get herself tested during pre-conception period for diabetes, hypertension, anemia, sexually transmitted diseases? |
|                            | Q13. Should women test herself for familial or genetic diseases before pregnancy?                                                      |
|                            | Q14. Effects of violence during pregnancy on child                                                                                     |
|                            | Q15. Three types of food groups                                                                                                        |
|                            | Q16. Which foods are rich in calories or energy?                                                                                       |
| Miscellaneous section      | Q17. Government of India scheme for empowerment of women                                                                               |
|                            | Q18. Women helpline number                                                                                                             |
|                            | Q19. Legal age of marriage                                                                                                             |

**Supplementary Table S3.** Session's name in the two flipbooks (*Yauvan* and *Sangini*).

| Session sequence | Name of the sessions in ' <i>Yauvan flipbook</i> ' for adolescents | Name of the sessions in ' <i>Sangini flipbook</i> ' for young married women |
|------------------|--------------------------------------------------------------------|-----------------------------------------------------------------------------|
| Session 1        | Life skills                                                        | Women empowerment                                                           |
| Session 2        | Pubertal changes                                                   | Marital communication                                                       |
| Session 3        | Nutrition care during adolescence                                  | Pre-conception care                                                         |
| Session 4        | Lifestyle disorders                                                | HIV/AIDS prevention and reproductive health                                 |
| Session 5        | Trauma and injuries                                                | Family planning and abortion                                                |
| Session 6        | Violence among adolescents                                         | Pregnancy care                                                              |
| Session 7        | Gender based violence                                              | Healthy relationships and domestic violence                                 |
| Session 8        | Mental health                                                      | Post-partum care                                                            |
| Session 9        | Substance abuse and stress management                              | Nutritional care                                                            |
| Session 10       | Sexual and reproductive health                                     | Lifestyle disorders                                                         |
| Session 11       | Child marriage prevention                                          | Men's health                                                                |
| Session 12       | AIDS/Sexually transmitted diseases                                 | Mental health                                                               |

**Supplementary Table S4.** Evaluation of relevance of agreement on the sessions, stories, photos and key messages of the flipbooks.

| S.no. | Item ( <i>Sangini Flipbook</i> )                         | Relevance*<br>(n=42) N<br>(I) | Item ( <i>Yauvan Flipbook</i> )                    | Relevance*<br>(n=42)N (I) |
|-------|----------------------------------------------------------|-------------------------------|----------------------------------------------------|---------------------------|
| 1.    | A session on women empowerment                           | 42 (1.00)                     | A session on life skills                           | 41 (0.97)                 |
| 2.    | A session on marital communication                       | 41 (0.97)                     | A session on pubertal changes                      | 42 (1.00)                 |
| 3.    | A session on pre-conception care                         | 41 (0.97)                     | A session on nutrition care during adolescence     | 42 (1.00)                 |
| 4.    | A session on HIV/AIDS prevention and reproductive health | 41 (0.97)                     | A session on lifestyle disorders                   | 38 (0.97)                 |
| 5.    | A session on family planning and abortion                | 40 (0.95)                     | A session on trauma and injuries                   | 39 (0.93)                 |
| 6.    | A session on pregnancy care                              | 41 (0.97)                     | A session on violence among adolescents            | 41 (0.97)                 |
| 7.    | A session on healthy relationships and domestic violence | 40 (0.95)                     | A session on gender based violence                 | 41 (0.97)                 |
| 8.    | A session on post-partum care                            | 41 (0.97)                     | A session on Mental health                         | 40 (0.95)                 |
| 9.    | A session on nutritional care                            | 42 (1.00)                     | A session on substance abuse and stress management | 40 (0.95)                 |
| 10.   | A session on lifestyle disorders                         | 39 (0.93)                     | A session on Sexual and reproductive health        | 39 (0.93)                 |
| 11.   | A session on men's health                                | 40 (0.95)                     | A session on child marriage prevention             | 41 (0.97)                 |
| 12.   | A session on mental health                               | 41 (0.97)                     | A session on AIDS/STD                              | 40 (0.95)                 |
| 13.   | Key messages in the end                                  | 40 (0.95)                     | Key messages in the end                            | 40 (0.95)                 |
| 14.   | Pictures or photos in each session                       | 37 (0.88)                     | Pictures or photos in each session                 | 37 (0.88)                 |
| 15.   | Stories at the end of session                            | 40 (0.95)                     | Stories at the end of each session                 | 39 (0.93)                 |
|       | Mean index score                                         | 0.96                          |                                                    | 0.95                      |

\* Number of participants agreed to the relevance of each item; \*\*I: Index.
